# Supplementary material for: Multi-SNP Analysis of GWAS Data Identifies Pathways Associated with Nonalcoholic Fatty Liver Disease
Source: PLoS One. 2013 Jul 19;8(7):e65982. doi: 10.1371/journal.pone.0065982 (PMC3716806; doi:10.1371/journal.pone.0065982)
Supplement: Table S3 — Pathways significantly associated with Lobular inflammation. (PDF) [file pone.0065982.s003.pdf]

**Table S3. Pathways significantly associated with Lobular inflammation**

| Pathway                                                                          | Source     | No. of genes<br>in pathway | No. of SNPs<br>in pathway | p(DS) | O.R. | q(O.R.)  | Significant<br>in HCC |
|----------------------------------------------------------------------------------|------------|----------------------------|---------------------------|-------|------|----------|-----------------------|
| Hormone ligand-binding receptors                                                 | Reactome   | 11                         | 10                        | 0.000 | 5.13 | 3.75E-06 |                       |
| Drug metabolism - other enzymes                                                  | KEGG       | 53                         | 39                        | 0.003 | > 10 | 2.50E-08 |                       |
| Regulation of gene expression in beta cells                                      | Reactome   | 11                         | 9                         | 0.004 | 9.17 | 8.07E-06 |                       |
| Neuroactive ligand-receptor interaction                                          | KEGG       | 27                         | 23                        | 0.004 | > 10 | 6.70E-08 |                       |
| beta-Alanine metabolism                                                          | KEGG       | 23                         | 20                        | 0.004 | > 10 | 1.44E-07 |                       |
| reversal of insulin resistance by leptin                                         | BioCarta   | 10                         | 8                         | 0.004 | 6.44 | 1.51E-05 |                       |
| Vitamins                                                                         | Reactome   | 6                          | 5                         | 0.006 | 2.54 | 4.92E-04 |                       |
| Prefoldin mediated transfer of substrate to CCT/TriC                             | Reactome   | 15                         | 10                        | 0.006 | 3.99 | 2.55E-03 |                       |
| Cholesterol biosynthesis                                                         | Reactome   | 8                          | 8                         | 0.007 | 4.61 | 6.85E-05 |                       |
| FOXA2 and FOXA3 transcription factor networks                                    | NCI-Nature | 44                         | 41                        | 0.007 | > 10 | 2.22E-08 |                       |
| Pyrimidine salvage reactions                                                     | Reactome   | 7                          | 7                         | 0.008 | 3.00 | 1.01E-03 |                       |
| regulation of spermatogenesis by crem                                            | BioCarta   | 10                         | 10                        | 0.010 | 7.72 | 9.18E-06 |                       |
| mRNA Processing                                                                  | Reactome   | 9                          | 7                         | 0.011 | 2.52 | 3.52E-03 |                       |
| Ascorbate and aldarate metabolism                                                | KEGG       | 26                         | 19                        | 0.011 | > 10 | 6.17E-06 |                       |
| pkc-catalyzed phosphorylation of inhibitory phosphoprotein of myosin phosphatase | BioCarta   | 21                         | 20                        | 0.012 | > 10 | 1.15E-07 |                       |
| Nicotinate metabolism                                                            | Reactome   | 12                         | 11                        | 0.013 | 8.55 | 1.89E-05 |                       |
| Histidine metabolism                                                             | KEGG       | 31                         | 27                        | 0.013 | > 10 | 7.26E-07 |                       |
| Glycoprotein hormones                                                            | Reactome   | 8                          | 7                         | 0.014 | 2.43 | 1.21E-04 |                       |
| Terpenoid biosynthesis                                                           | KEGG       | 6                          | 6                         | 0.015 | 3.42 | 4.66E-04 |                       |
| Pathogenic Escherichia coli infection                                            | KEGG       | 32                         | 27                        | 0.016 | > 10 | 4.21E-05 |                       |
| Cyclin A/B1 associated events during G2/M transition                             | Reactome   | 9                          | 8                         | 0.016 | 3.34 | 1.06E-03 |                       |
| Propanoate metabolism                                                            | KEGG       | 33                         | 29                        | 0.018 | > 10 | 3.32E-08 |                       |
| Lysine degradation                                                               | KEGG       | 49                         | 41                        | 0.018 | > 10 | 2.15E-07 |                       |
| Cyclin E associated events during G1/S transition                                | Reactome   | 6                          | 5                         | 0.019 | 1.66 | 1.93E-02 |                       |
| Calcineurin-regulated NFAT-dependent transcription in lymphocytes                | NCI-Nature | 49                         | 43                        | 0.019 | > 10 | 3.59E-09 |                       |
| rho cell motility signaling pathway                                              | BioCarta   | 32                         | 28                        | 0.022 | > 10 | 8.38E-08 |                       |
| wnt lrp6 signalling                                                              | BioCarta   | 7                          | 6                         | 0.023 | 2.25 | 4.35E-03 |                       |
| TRAIL signaling pathway                                                          | NCI-Nature | 22                         | 17                        | 0.023 | > 10 | 6.92E-05 |                       |
| Golgi Associated Vesicle Biogenesis                                              | Reactome   | 18                         | 16                        | 0.024 | > 10 | 1.48E-05 |                       |
| p38 signaling mediated by MAPKAP kinases                                         | NCI-Nature | 21                         | 19                        | 0.024 | > 10 | 2.64E-06 |                       |
| Cyclin A:Cdk2-associated events at S phase entry                                 | Reactome   | 6                          | 5                         | 0.025 | 1.66 | 1.93E-02 |                       |
| rac1 cell motility signaling pathway                                             | BioCarta   | 36                         | 32                        | 0.026 | > 10 | 1.64E-08 |                       |
| Tryptophan metabolism                                                            | KEGG       | 48                         | 41                        | 0.028 | > 10 | 5.13E-08 |                       |
| 3-Chloroacrylic acid degradation                                                 | KEGG       | 13                         | 13                        | 0.029 | 4.26 | 2.09E-04 |                       |
| Striated Muscle Contraction                                                      | Reactome   | 7                          | 7                         | 0.029 | 3.38 | 8.13E-04 |                       |
| Regulation of Insulin Secretion by Glucagon-like Peptide-1                       | Reactome   | 10                         | 9                         | 0.030 | 4.89 | 2.50E-04 |                       |
| fas signaling pathway (cd95)                                                     | BioCarta   | 20                         | 19                        | 0.030 | > 10 | 7.12E-07 |                       |
| Lysosome Vesicle Biogenesis                                                      | Reactome   | 7                          | 7                         | 0.032 | 3.57 | 4.59E-04 |                       |
| Signaling events regulated by Ret tyrosine kinase                                | NCI-Nature | 39                         | 34                        | 0.033 | > 10 | 2.15E-08 |                       |
| Citrate cycle (TCA cycle)                                                        | KEGG       | 30                         | 28                        | 0.033 | > 10 | 9.38E-07 |                       |
| B cell receptor signaling pathway                                                | KEGG       | 58                         | 47                        | 0.034 | > 10 | 7.81E-09 |                       |
| FAS signaling pathway (CD95)                                                     | NCI-Nature | 35                         | 33                        | 0.034 | > 10 | 1.31E-07 |                       |
| Synthesis of DNA                                                                 | Reactome   | 10                         | 8                         | 0.035 | 3.55 | 3.57E-03 |                       |
| angiotensin ii mediated activation of jnk pathway via pyk2 dependent signaling   | BioCarta   | 34                         | 28                        | 0.035 | > 10 | 1.01E-07 |                       |
| endocytotic role of ndk phosphins and dynamin                                    | BioCarta   | 17                         | 15                        | 0.036 | > 10 | 3.59E-05 |                       |
| EphrinA-EPHA pathway                                                             | NCI-Nature | 8                          | 7                         | 0.037 | 6.90 | 2.64E-06 |                       |
| mitochondrial fatty acid beta-oxidation of unsaturated fatty acids               | Reactome   | 6                          | 5                         | 0.039 | 1.74 | 2.96E-02 |                       |
| Beta oxidation of decanoyl-CoA to octanoyl-CoA-CoA                               | Reactome   | 5                          | 5                         | 0.039 | 1.68 | 4.22E-02 |                       |
| Intrinsic Pathway                                                                | Reactome   | 17                         | 12                        | 0.039 | > 10 | 6.11E-06 |                       |
| Biosynthesis of steroids                                                         | KEGG       | 23                         | 21                        | 0.040 | > 10 | 6.46E-05 |                       |
| links between pyk2 and map kinases                                               | BioCarta   | 26                         | 22                        | 0.042 | > 10 | 4.17E-07 |                       |
| BARD1 signaling events                                                           | NCI-Nature | 29                         | 27                        | 0.042 | > 10 | 1.30E-05 |                       |
| effects of calcineurin in keratinocyte differentiation                           | BioCarta   | 13                         | 13                        | 0.049 | > 10 | 3.77E-06 |                       |
| Further platelet releasate                                                       | Reactome   | 22                         | 20                        | 0.049 | > 10 | 9.87E-05 |                       |

Note: Pathway-length based resampled p-values, denoted as p(DS), are given for significant pathways (p<0.05), along with odds ratios and associated FDRs for a logistic regression model. The pathways previously shown to be associated with HCC are marked.
