# Supplementary material for: Multi-SNP Analysis of GWAS Data Identifies Pathways Associated with Nonalcoholic Fatty Liver Disease
Source: PLoS One. 2013 Jul 19;8(7):e65982. doi: 10.1371/journal.pone.0065982 (PMC3716806; doi:10.1371/journal.pone.0065982)
Supplement: Table S5 — Pathways significantly associated with Fibrosis. (PDF) [file pone.0065982.s005.pdf]

**Table S5. Pathways significantly associated with Fibrosis**

| Pathway                                                                                                                                                     | Source     | No. of genes<br>in pathway | No. of SNPs<br>in pathway | p(DS) | O.R. | q(O.R.)  | Significant<br>in HCC |
|-------------------------------------------------------------------------------------------------------------------------------------------------------------|------------|----------------------------|---------------------------|-------|------|----------|-----------------------|
| p38 MAPK signaling pathway                                                                                                                                  | NCI-Nature | 29                         | 25                        | 0.000 | > 10 | 2.18E-08 |                       |
| Olfactory transduction                                                                                                                                      | KEGG       | 380                        | 303                       | 0.004 | > 10 | 1.22E-09 |                       |
| calcium signaling by hbv of hepatitis b virus                                                                                                               | BioCarta   | 16                         | 13                        | 0.006 | > 10 | 1.13E-05 |                       |
| N-Glycan biosynthesis                                                                                                                                       | KEGG       | 44                         | 35                        | 0.008 | > 10 | 5.07E-07 |                       |
| tumor suppressor arf inhibits ribosomal biogenesis                                                                                                          | BioCarta   | 23                         | 20                        | 0.009 | > 10 | 1.50E-06 |                       |
| mapkinase signaling pathway                                                                                                                                 | BioCarta   | 55                         | 46                        | 0.010 | > 10 | 1.53E-09 |                       |
| multi-drug resistance factors                                                                                                                               | BioCarta   | 6                          | 5                         | 0.012 | 1.63 | 6.91E-03 |                       |
| Cysteine metabolism                                                                                                                                         | KEGG       | 13                         | 11                        | 0.012 | 7.55 | 3.02E-05 |                       |
| Retinol metabolism                                                                                                                                          | KEGG       | 63                         | 46                        | 0.012 | > 10 | 3.19E-07 |                       |
| nfkb activation by nontypeable hemophilus influenzae                                                                                                        | BioCarta   | 30                         | 25                        | 0.012 | > 10 | 3.90E-08 |                       |
| IL6-mediated signaling events                                                                                                                               | NCI-Nature | 45                         | 38                        | 0.017 | > 10 | 1.65E-08 |                       |
| role of nicotinic acetylcholine receptors in the regulation of apoptosis                                                                                    | BioCarta   | 17                         | 14                        | 0.017 | > 10 | 9.12E-06 |                       |
| Galactose metabolism                                                                                                                                        | KEGG       | 26                         | 22                        | 0.018 | > 10 | 1.38E-06 | yes                   |
| the 41bb-dependent immune response                                                                                                                          | BioCarta   | 14                         | 13                        | 0.019 | 9.87 | 2.82E-05 |                       |
| Hypoxic and oxygen homeostasis regulation of HIF-1-alpha                                                                                                    | NCI-Nature | 18                         | 17                        | 0.019 | > 10 | 4.65E-05 |                       |
| nuclear receptors coordinate the activities of chromatin remodeling complexes and coactivators to facilitate initiation of transcription in carcinoma cells | BioCarta   | 15                         | 14                        | 0.021 | > 10 | 1.14E-05 |                       |
| Ethanol is oxidized by NAD+ to form acetaldehyde, NADH, and H+                                                                                              | Reactome   | 6                          | 6                         | 0.021 | 2.01 | 3.10E-04 |                       |
| JNK signaling in the CD4+ TCR pathway                                                                                                                       | NCI-Nature | 13                         | 11                        | 0.022 | > 10 | 5.23E-06 |                       |
| Terpenoid biosynthesis                                                                                                                                      | KEGG       | 6                          | 6                         | 0.027 | 2.20 | 1.23E-02 |                       |
| Insulin signaling pathway                                                                                                                                   | KEGG       | 136                        | 111                       | 0.028 | > 10 | 6.43E-11 |                       |
| Vitamins                                                                                                                                                    | Reactome   | 6                          | 5                         | 0.028 | 2.61 | 3.70E-04 |                       |
| mRNA Splicing - Minor Pathway                                                                                                                               | Reactome   | 40                         | 31                        | 0.036 | > 10 | 4.51E-04 |                       |
| Reelin signaling pathway                                                                                                                                    | NCI-Nature | 29                         | 25                        | 0.040 | > 10 | 1.35E-07 | yes                   |
| Global Genomic NER (GG-NER)                                                                                                                                 | Reactome   | 20                         | 17                        | 0.043 | 7.29 | 4.30E-04 |                       |
| Gluconeogenesis                                                                                                                                             | Reactome   | 15                         | 11                        | 0.044 | 6.39 | 1.70E-04 |                       |
| Cellular roles of Anthrax toxin                                                                                                                             | NCI-Nature | 22                         | 17                        | 0.046 | > 10 | 2.87E-05 |                       |
| snRNP Assembly                                                                                                                                              | Reactome   | 47                         | 38                        | 0.048 | > 10 | 8.11E-05 |                       |
| regulation of transcriptional activity by pml                                                                                                               | BioCarta   | 12                         | 10                        | 0.049 | 5.96 | 1.43E-04 |                       |
| IL1-mediated signaling events                                                                                                                               | NCI-Nature | 36                         | 30                        | 0.049 | > 10 | 2.41E-06 |                       |
| cdk regulation of dna replication                                                                                                                           | BioCarta   | 18                         | 13                        | 0.049 | 5.34 | 5.22E-04 |                       |

Note: Pathway-length based resampled p-values, denoted as p(DS), are given for significant pathways ( $p < 0.05$ ), along with odds ratios and associated FDRs for a logistic regression model. The pathways previously shown to be associated with HCC are marked.
